# Supplementary material
Source: publisher site journal article supplement (https://www.dovepress.com/article/490350)
Supplement: Supplementary file 1 [file get_supplementary_file.php]

# Supplemental Materials

### *Survey design and informed consent*

**Informed Consent Statement:** included at the beginning of the survey explaining participation is voluntary, anonymous, and data will be used to support improving clinical trials in the future. Participants selected ‘yes’ certifying that they were at least 18 years of age and willing to participate before they could proceed with completing the survey.

**Survey Length:** 26 questions with up to 19 additional conditional questions

**Survey Sections:**

- - Identity (i.e. demographics including age, ethnicity, sex, gender identity, religion)
  - Socioeconomic Factors (i.e. education, employment, financial security)
  - Potential Biases (i.e. physician preferences, influences on decision making)
  - Medical Factors (i.e. chronic illness, treatments, health insurance)
  - Technology/Wearables (i.e. health monitoring)
  - Clinical Trials (i.e. factors which influence decision making)
